# Supplementary material
Source: PubMed Central journal article supplement (PMC6813010)
Supplement: JCM.00985-19-s0001.pdf [file JCM.00985-19-s0001.pdf]

1 **SUPPLEMENTAL MATERIAL**

2

3 **Comparing QuantiFERON-TB Gold Plus with other tests to diagnose**

4 ***Mycobacterium tuberculosis* infection**

5

6

7

8

9 **REFERENCE**

10 **S1.** Cain KP, Benoit SR, Winston CA, Mac Kenzie WR. Tuberculosis among foreign-  
11 born persons in the United States. JAMA. 2008; 300 (4):405-12.

12

13

14

15

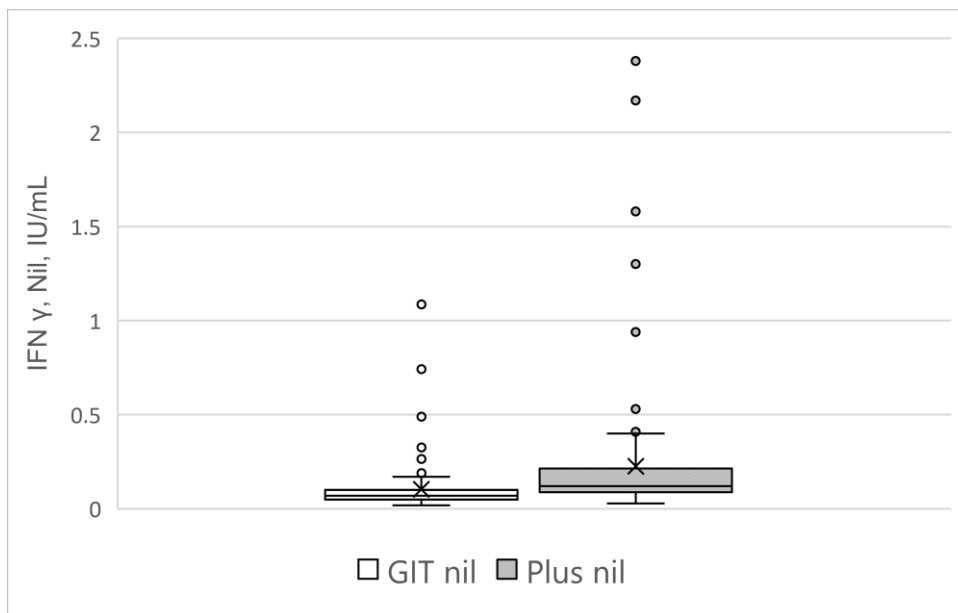

16

17

18 **FIG S1** Box and whisker plot showing the nil distribution for samples that used  
19 separate nil tubes (P=0.001). For 102 samples nil tubes were either from GIT  
20 (QuantiFERON-TB Gold In-Tube) or Plus (QuantiFERON-TB Gold Plus) sets for  
21 respective tests.

22

23 **TABLE S1 Countries by risk level**  
 24 (Based on TB case rates of foreign-born persons in the United States<sup>S1</sup>)

|                                     |                                       |                                   |                         |
|-------------------------------------|---------------------------------------|-----------------------------------|-------------------------|
| Afghanistan (High)                  | Equatorial Guinea (High)              | Macedonia (Medium)                | Seychelles (High)       |
| Albania (Medium)                    | Eritrea (High)                        | Madagascar (High)                 | Sierra Leone (High)     |
| Algeria (Medium)                    | Estonia (Medium)                      | Malawi (High)                     | Singapore (High)        |
| Angola (High)                       | Ethiopia (High)                       | Malaysia (Medium)                 | Slovakia (Medium)       |
| Argentina (Medium)                  | Federated States of Micronesia (High) | Maldives (High)                   | Slovenia (Medium)       |
| Armenia (Medium)                    | French Guiana (Medium)                | Mali (High)                       | Solomon Islands (High)  |
| Azerbaijan (High)                   | French Polynesia (Medium)             | Marshall Islands (High)           | Somalia (High)          |
| Bahrain (Medium)                    | Gabon (High)                          | Mauritania (High)                 | South Africa (Medium)   |
| Bangladesh(High)                    | Gambia (High)                         | Mauritius (High)                  | South Korea (Medium)    |
| Belarus (Medium)                    | Georgia (High)                        | Mexico (Medium)                   | South Sudan (Medium)    |
| Belize (Medium)                     | Ghana (Medium)                        | Moldova (Medium)                  | Sri Lanka (High)        |
| Benin (High)                        | Guam (Medium)                         | Mongolia (High)                   | Sudan (Medium)          |
| Bhutan (High)                       | Guatemala (High)                      | Morocco (Medium)                  | Suriname (Medium)       |
| Bolivia (High)                      | Guinea (High)                         | Mozambique (High)                 | Swaziland (High)        |
| Bosnia and Herzegovina (Medium)     | Guinea-Bissau (High)                  | Myanmar (Burma) (High)            | Syria (Medium)          |
| Botswana (High)                     | Guyana (Medium)                       | Namibia (High)                    | Taiwan (Medium)         |
| Brazil (Medium)                     | Haiti (High)                          | Nepal (High)                      | Tajikistan (Medium)     |
| Brunei (High)                       | Honduras (High)                       | New Caledonia (Medium)            | Tanzania (High)         |
| Bulgaria (Medium)                   | Hong Kong (Medium)                    | Nicaragua (Medium)                | Thailand (Medium)       |
| Burkina Faso (High)                 | Hungary (Medium)                      | Niger (High)                      | Tibet (High)            |
| Burundi (High)                      | India (High)                          | Nigeria (Medium)                  | Togo (High)             |
| Cambodia (High)                     | Indonesia (High)                      | North Korea (Medium)              | Tonga (Medium)          |
| Cameroon (High)                     | Iran (Medium)                         | Northern Mariana Islands (Medium) | Tunisia (High)          |
| Cape Verde (High)                   | Iraq (Medium)                         | Oman (Medium)                     | Turkey (Medium)         |
| Central African Republic (High)     | Ivory Coast (High)                    | Pakistan (High)                   | Turkmenistan (Medium)   |
| Chad (High)                         | Japan (Medium)                        | Palau (Medium)                    | Tuvalu (High)           |
| Chile (Medium)                      | Jordan (Medium)                       | Palestine (Medium)                | Uganda (High)           |
| China (High)                        | Kazakhstan (Medium)                   | Panama (Medium)                   | Ukraine (Medium)        |
| Colombia (Medium)                   | Kenya (High)                          | Papua New Guinea (High)           | Uruguay (Medium)        |
| Comoros (High)                      | Kiribati (High)                       | Peru (High)                       | Uzbekistan (Medium)     |
| Congo (High)                        | Kuwait (Medium)                       | Philippines (High)                | Vanuatu (Medium)        |
| Cook Islands (Medium)               | Kyrgyzstan (Medium)                   | Poland (Medium)                   | Venezuela (Medium)      |
| Costa Rica (Medium)                 | Laos (High)                           | Portugal (Medium)                 | Vietnam (High)          |
| Croatia (Medium)                    | Latvia (Medium)                       | Qatar (Medium)                    | Western Sahara (Medium) |
| Democratic Republic of Congo (High) | Lebanon (Medium)                      | Romania (Medium)                  | Yemen (High)            |
| Djibouti (High)                     | Lesotho (High)                        | Russia (Medium)                   | Zambia (High)           |
| Dominican Republic (High)           | Liberia (High)                        | Rwanda (High)                     | Zimbabwe (High)         |
| East Timor (High)                   | Libya (High)                          | Sao Tome and Principe (High)      |                         |
| Ecuador (High)                      | Lithuania (Medium)                    | Saudi Arabia (Medium)             |                         |
| Egypt (Medium)                      | Hong Kong (Medium)                    | Senegal (High)                    |                         |
| El Salvador (Medium)                | Macao (Medium)                        | Serbia and Montenegro (Medium)    |                         |

25

26

27

28 **TABLE S2** Comparing QFT-Plus for 77 children<sup>a</sup> <15 years old with QFT-GIT, T-SPOT and  
 29 TST results

| QFT-Plus | Total,<br><i>n</i> | <u>QFT-GIT</u>           |                          | <u>T-SPOT</u>            |                          | <u>TST</u>               |                          |
|----------|--------------------|--------------------------|--------------------------|--------------------------|--------------------------|--------------------------|--------------------------|
|          |                    | Positive<br><i>n</i> (%) | Negative<br><i>n</i> (%) | Positive<br><i>n</i> (%) | Negative<br><i>n</i> (%) | Positive<br><i>n</i> (%) | Negative<br><i>n</i> (%) |
| Positive | 1                  | 1 (100)                  | 0(0)                     | 1(100)                   | 0 (0)                    | 1(100)                   | 0(0)                     |
| Negative | 76 <sup>b</sup>    | 0(0)                     | 76(100)                  | 0(0)                     | 75(97)                   | 14(18)                   | 62(81)                   |

30

31 <sup>a</sup>The 77 children included 15 U.S.-born and 12 close contacts to an infectious TB case.

32 QFT-GIT=QuantiFERON-TB Gold In-Tube; QFT-Plus=QuantiFERON-TB Gold Plus;

33 TST=Tuberculin skin test; T-SPOT= T-SPOT. *TB*; <sup>b</sup>One participant had a borderline

34 T-SPOT result

35

36

37 **TABLE S3a** Test agreement between QFT-GIT and QFT-Plus TB1 and TB2 antigens  
 38

| Category                   | Total,<br><i>n</i> | QFT-Plus<br>antigens | QFT-GIT/TB1 and TB2 results, <i>n</i> (%) |          |       |        | Kappa |
|----------------------------|--------------------|----------------------|-------------------------------------------|----------|-------|--------|-------|
|                            |                    |                      | +/+                                       | -/-      | +/-   | -/+    |       |
| All <sup>a</sup>           | 506                | TB1                  | 92 (18)                                   | 389 (77) | 9 (2) | 16 (3) | 0.85  |
|                            |                    | TB2                  | 93 (18)                                   | 385 (76) | 8 (2) | 20 (4) | 0.83  |
| Non-U.S.-born <sup>b</sup> | 434                | TB1                  | 86(20)                                    | 324 (75) | 9 (2) | 15(3)  | 0.84  |
|                            |                    | TB2                  | 87(20)                                    | 320 (74) | 8 (2) | 19 (4) | 0.83  |
| Class B1 immigrant         | 49                 | TB1                  | 19 (39)                                   | 26 (53)  | 0 (0) | 4 (8)  | 0.83  |
|                            |                    | TB2                  | 18 (37)                                   | 27 (55)  | 1 (2) | 3 (6)  | 0.83  |
| U.S.-born <sup>c</sup>     | 71                 | TB1                  | 6 (9)                                     | 64 (90)  | 0 (0) | 1 (1)  | 0.92  |
|                            |                    | TB2                  | 6 (9)                                     | 64 (90)  | 0 (0) | 1 (1)  | 0.92  |
| Close Contact              | 48                 | TB1                  | 3 (6)                                     | 44 (92)  | 0 (0) | 1 (2)  | 0.85  |
|                            |                    | TB2                  | 3 (6)                                     | 44 (92)  | 0 (0) | 1 (2)  | 0.85  |

39

40 <sup>a</sup>2 Indeterminate QFT-Plus results excluded; <sup>b</sup>Includes 49 Class B1 immigrants and 31  
 41 close contacts; <sup>c</sup>Includes close contacts; Definitions: Class B1 immigrant=immigrant with  
 42 abnormal chest radiograph but negative sputum smears and cultures in overseas  
 43 examinations; Close contact= ≥8h/week exposure to TB case; QFT-GIT= QuantiFERON-  
 44 TB Gold In-Tube; QFT-Plus= QuantiFERON-TB Gold Plus;

45

46

47 **TABLE S3b** Agreement between QFT-Plus antigens TB1 and TB2  
 48

| Category                     | Total,<br><i>n</i> | QFT-Plus TB1/TB2, <i>n</i> (%) |          |       |        | Kappa |
|------------------------------|--------------------|--------------------------------|----------|-------|--------|-------|
|                              |                    | +/+                            | -/-      | +/-   | -/+    |       |
| All <sup>a</sup>             | 506                | 102 (20)                       | 387(77)  | 6 (1) | 11 (2) | 0.90  |
| Non-U.S.-born <sup>a,b</sup> | 434                | 96 (22)                        | 323 (74) | 5 (1) | 10 (2) | 0.90  |
| Class B1<br>immigrant        | 49                 | 20 (41)                        | 25 (51)  | 3 (6) | 1 (2)  | 0.84  |
| U.S.-born <sup>c</sup>       | 71                 | 6 (8)                          | 63 (89)  | 1 (1) | 1 (1)  | 0.84  |
| Close contact                | 48                 | 4 (8)                          | 44 (92)  | 0 (0) | 0 (0)  | 1.0   |

49  
 50 <sup>a</sup>2 Indeterminate QFT plus results excluded; <sup>b</sup>Includes 49 Class B1 immigrants and 31  
 51 close contacts; <sup>c</sup>Includes close contacts; Definitions: Class B1 immigrant=immigrant  
 52 with abnormal chest radiograph but negative sputum smears and cultures in overseas  
 53 examinations; Close contact= $\geq$ 8h/week exposure to TB case; to TB case; QFT-Plus=  
 54 QuantiFERON-TB Gold Plus;

55  
 56  
 57  
 58  
 59  
 60  
 61  
 62  
 63  
 64  
 65  
 66  
 67  
 68  
 69  
 70

71 **TABLE S4a** Combined QFT-GIT, T-SPOT, and TST results among positive or negative  
 72 QFT-Plus results

| <b>QFT-Plus result</b> | <b>Total, <i>n</i></b> | <b>Triple positive<br/><i>n</i> (%)</b> | <b>Triple negative<br/><i>n</i> (%)</b> | <b>IGRA(+)/<br/>TST(-)<br/><i>n</i> (%)</b> | <b>IGRA(-)/<br/>TST(+)<br/><i>n</i> (%)</b> |
|------------------------|------------------------|-----------------------------------------|-----------------------------------------|---------------------------------------------|---------------------------------------------|
| Positive               | 119                    | 51 (43)                                 | 10 (8)                                  | 10 (8)                                      | 6 (5)                                       |
| Negative               | 387                    | 2 (0.5)                                 | 288 (74)                                | 0 (0)                                       | 77 (20)                                     |
| Indeterminate          | 2                      | 1 (50)                                  | 0 (0)                                   | 0 (0)                                       | 0 (0)                                       |

73  
 74 Definitions: Triple positive= Positive by QFT-GIT, T-SPOT, and TST; Triple negative:  
 75 Negative by QFT-GIT, T-SPOT, and TST; IGRA= Interferon gamma release assay;  
 76 IGRA(+)= Results positive for both QFT-GIT and T-SPOT; IGRA(-)= Results negative for  
 77 both QFT-GIT and T-SPOT; QFT-GIT= QuantiFERON-TB Gold In-Tube; QFT-Plus=  
 78 QuantiFERON-TB Gold Plus; TST=Tuberculin skin test; T-SPOT= T-SPOT. *TB*

79  
 80



81 **TABLE S4b** Distribution of QFT-GIT, T-SPOT and TST results among positive or  
 82 negative QFT-Plus results

| QFT-Plus                   | QFTGIT             |                          |                          | TSPOT                    |                          |                            |                         | TST                      |                          |
|----------------------------|--------------------|--------------------------|--------------------------|--------------------------|--------------------------|----------------------------|-------------------------|--------------------------|--------------------------|
|                            | Total,<br><i>n</i> | Positive<br><i>n</i> (%) | Negative<br><i>n</i> (%) | Positive<br><i>n</i> (%) | Negative<br><i>n</i> (%) | Borderline<br><i>n</i> (%) | Invalid<br><i>n</i> (%) | Positive<br><i>n</i> (%) | Negative<br><i>n</i> (%) |
| Positive                   | 119                | 94(79)                   | 25(21)                   | 68(57)                   | 37(31)                   | 10(8)                      | 4(3)                    | 91(76)                   | 28(24)                   |
| Negative                   | 387                | 7 (2)                    | 380(98)                  | 6(2)                     | 369(95)                  | 11(3)                      | 1(0)                    | 87(22)                   | 300(78)                  |
| Indeterminate <sup>a</sup> | 2                  | 2(100)                   | 0                        | 1 (0.5)                  | 1(0.5)                   | 0(0)                       | 0(0)                    | 2 (100)                  | 0(0)                     |
| Total                      | 508                | 103(20)                  | 405(80)                  | 75(15)                   | 407(80)                  | 21(4)                      | 5(1)                    | 180(35)                  | 328(65)                  |

83

84 QFT-GIT=QuantiFERON-TB Gold In-Tube; QFT-Plus=QuantiFERON-TB Gold Plus;

85 TST=Tuberculin skin test; T-SPOT= T-SPOT. *TB*. <sup>a</sup>The 2 indeterminate QFT-Plus were

86 either due to high nil, >8.0 IU/mL, or low mitogen, 0.5 IU/mL.

87

88 **TABLE S5** Demographics of 12 participants with QFT-Plus positive and TST/T-  
 89 SPOT/QFT-GIT negative results, and QFT-Plus negative and TST/T-SPOT/QFT-GIT  
 90 positive results

91

| #  | Gender            | Age | Birth country | TST (mm) | T-SPOT <sup>b</sup> | IFN $\gamma$ (IU/mL) |          |      |
|----|-------------------|-----|---------------|----------|---------------------|----------------------|----------|------|
|    |                   |     |               |          |                     | QFT-GIT              | QFT-Plus |      |
|    |                   |     |               |          |                     |                      | TB1      | TB2  |
| 1  | Male              | 43  | Bhutan        | 7        | 2                   | 0.2                  | 0.55     | 0.45 |
| 2  | Female            | 27  | Mongolia      | 0        | 1                   | -0.06                | 0.5      | 0.38 |
| 3  | Male              | 31  | Iraq          | 0        | 2                   | 0.19                 | 0.52     | 0.07 |
| 4  | Male <sup>a</sup> | 47  | United States | 0        | 3                   | 0.08                 | 0.36     | 0.31 |
| 5  | Male              | 39  | Bhutan        | 7        | 2                   | 0.18                 | 0.32     | 0.36 |
| 6  | Female            | 40  | Myanmar       | 0        | 0                   | 0.06                 | 0.26     | 0.4  |
| 7  | Female            | 28  | Bhutan        | 9        | 1                   | 0.17                 | 0.16     | 0.45 |
| 8  | Male              | 42  | Congo (DRC)   | 5        | 2                   | 0.34                 | 0.27     | 0.46 |
| 9  | Male              | 26  | Somalia       | 0        | 0                   | 0.01                 | 0.14     | 0.43 |
| 10 | Male <sup>a</sup> | 49  | United States | 0        | 1                   | 0.02                 | 0        | 2.21 |
| 11 | Female            | 24  | El Salvador   | 17       | 33                  | 1.33                 | 0.29     | 0.25 |
| 12 | Female            | 18  | Philippines   | 14       | 44                  | 0.46                 | 0.27     | 0.32 |

92

93 <sup>a</sup>Homeless shelter residents with local LTBI prevalence  $\geq 25\%$ , <sup>b</sup>Number of spots,  
 94 greater of Panel A or B minus nil. #1-10 QFT-Plus positive/QFT-GIT, T-SPOT, TST  
 95 negative; # 11 & 12 QFT-Plus negative and QFT-GIT, T-SPOT, TST positive; QFT-  
 96 GIT=QuantiFERON-TB Gold In-Tube, antigen minus nil values are presented; QFT-

97 Plus=QuantiFERON-TB Gold Plus, antigen minus nil values are presented for TB1 and  
 98 TB2; TST=Tuberculin skin test; T-SPOT= T-SPOT. *TB*

99 **TABLE S6** Sample collection and laboratory methods for discordant and all samples  
 100

| Procedure/Methods                                     | <u>Discordant, n=34</u> |                          | <u>All, n=508</u>       |                          |
|-------------------------------------------------------|-------------------------|--------------------------|-------------------------|--------------------------|
|                                                       | QFT-GIT<br><i>n</i> (%) | QFT-Plus<br><i>n</i> (%) | QFT-GIT<br><i>n</i> (%) | QFT-Plus<br><i>n</i> (%) |
| <b>Blood draw</b>                                     |                         |                          |                         |                          |
| Directly into QFT tubes                               | 29 (85)                 | 27 (79)                  | 414 (81)                | 364 (72)                 |
| Heparin tube first, transferred                       | 5 (15)                  | 7 (21)                   | 94 (19)                 | 144 (28)                 |
| <b>Number of blood collection tubes</b>               |                         |                          |                         |                          |
| 5 tubes/Common nil and mitogen                        | 30 (88)                 | 30 (88)                  | 406 (80)                | 406 (80)                 |
| 7 tubes/Separate nil and mitogen                      | 4 (12)                  | 4 (12)                   | 102 (20)                | 102 (20)                 |
| <b>Source of Nil/Mitogen for 5 tubes <sup>a</sup></b> |                         |                          |                         |                          |
| From QFT-GIT set                                      | 21 (70)                 | 21 (70)                  | 278 (69)                | 278 (69)                 |
| From QFT-Plus set                                     | 8 (27)                  | 8 (27)                   | 115 (28)                | 115 (28)                 |
| <b>Plates</b>                                         |                         |                          |                         |                          |
| Common plate <sup>b</sup>                             | 12 (35)                 | 12 (35)                  | 144 (28)                | 144 (28)                 |
| Separate plates <sup>c</sup>                          | 22 (65)                 | 22 (65)                  | 364 (72)                | 364 (72)                 |
| <b>Standard curve</b>                                 |                         |                          |                         |                          |
| 4 point                                               | 5 (15)                  | 34 (100)                 | 92 (18)                 | 508 (100)                |
| 8 point                                               | 29 (85)                 | 0 (0)                    | 416 (82)                | 0 (0)                    |
| <b>Samples storage before run</b>                     |                         |                          |                         |                          |
| Run directly after 37°C incubation                    | 2 (6)                   | 0 (0)                    | 50 (10)                 | 0 (0)                    |

|                              |         |          |          |           |
|------------------------------|---------|----------|----------|-----------|
| Stored at 4°C before running | 32 (94) | 32 (100) | 458 (90) | 508 (100) |
| <b>ELISA run</b>             |         |          |          |           |
| Automated                    | 16 (47) | 14 (41)  | 204 (40) | 154 (30)  |
| Manual                       | 18 (53) | 20 (58)  | 304 (60) | 354 (70)  |

101

102 <sup>a</sup>Missing information for samples on the source of nil and mitogen tubes, denominator  
103 for discordant sample, n=30 and for 'All' samples, n= 406; QFT-GIT=QuantiFERON-TB  
104 Gold In-Tube; QFT-Plus=QuantiFERON-TB Gold Plus; <sup>b</sup>Both QFT-GIT and QFT-Plus  
105 samples run on the same plate with one set of nil and mitogen, <sup>c</sup>Both QFT-GIT and  
106 QFT-Plus samples run on separate plates, each with its own nil and mitogen
